# Supplementary material for: Thalamic Nuclei Volumes in Psychotic Disorders and in Youths With Psychosis Spectrum Symptoms
Source: Atypon-hosted journal article supplement (doi:10.1176/appi.ajp.2020.19101099), 2020-09-11
Supplement: appi.ajp.2020.19101099.ds001.pdf [file appi.ajp.2020.19101099.ds001.pdf]

 


Psychiatry Online
